# Supplementary material for: ERECTA-Family Receptor Kinases Regulate Stem Cell Homeostasis via Buffering its Cytokinin Responsiveness in the Shoot Apical Meristem
Source: PubMed Central journal article supplement — Plant Cell Physiol. 2012 Aug 9;54(3):343–51. doi: 10.1093/pcp/pcs109 (PMC3589826; doi:10.1093/pcp/pcs109), 2012-08-09
Supplement: supp_pcs109_pcp-2012-e-00249-File009.pdf [file supp_pcs109_pcp-2012-e-00249-File009.pdf]

# Supplemental Figure S1

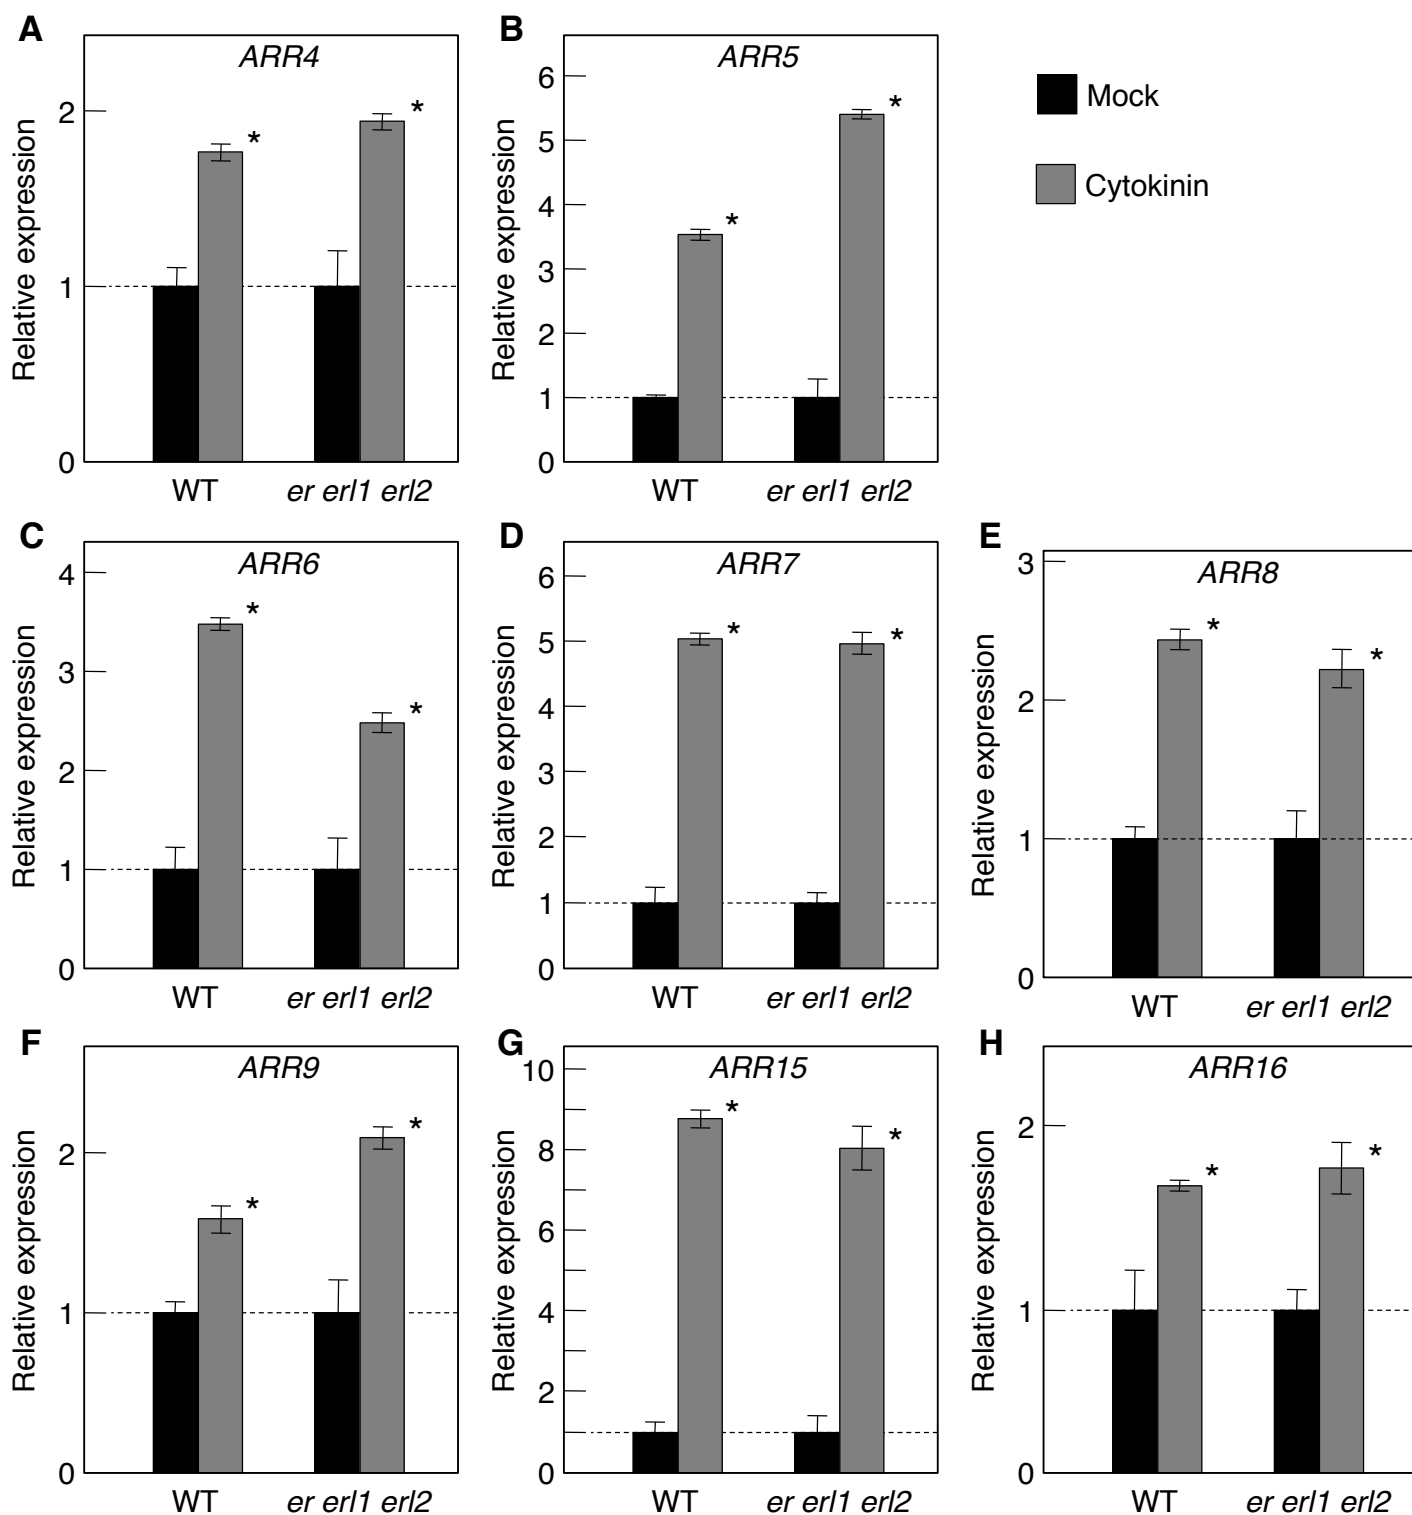

## Supplemental Figure S1

### Expression levels of several *type-A* ARRs with/without cytokinin treatment.

Aerial parts of 10-day-old plants grown on normal or cytokinin-containing media were analyzed by quantitative RT-PCR. The expression levels were normalized with respect to that of  $\beta$ -*TUBULIN* and the normalized values without cytokinin treatment were set at 1. Data shown are means of four independent samples (10 individuals were collected as a pool for each sample) with error bars representing s.d. Asterisks indicate significant differences by Student's *t* test ( $P < 0.05$ ).

# Supplemental Figure S2

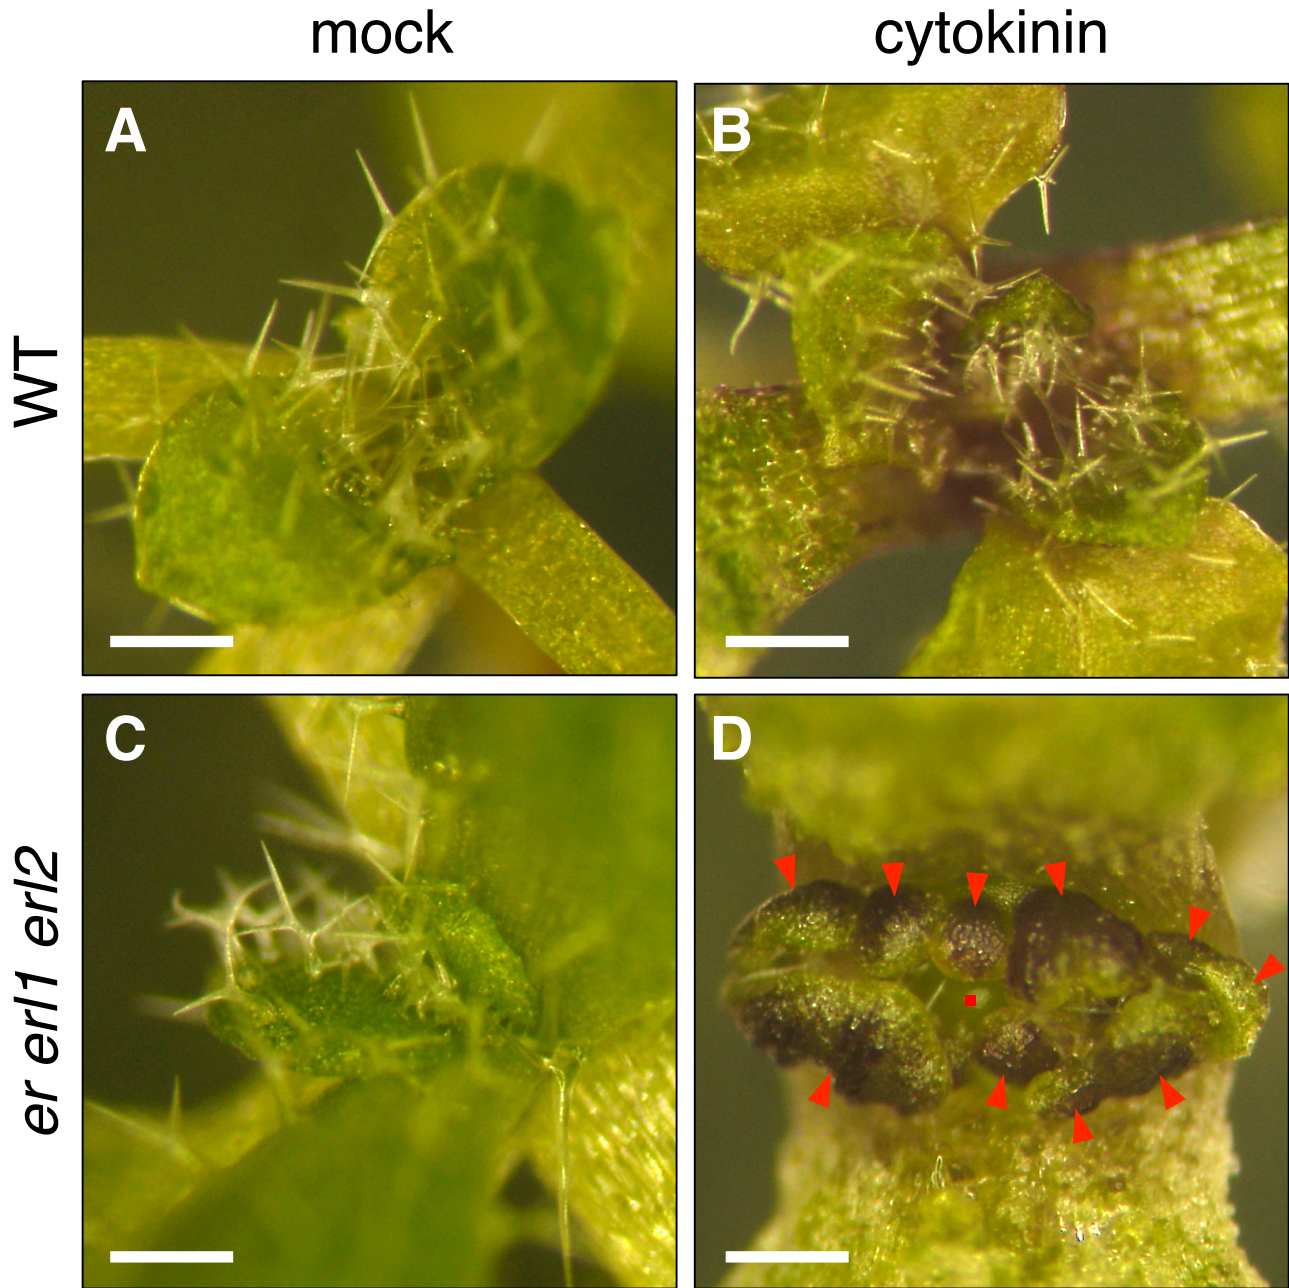

**Supplemental Figure S2**

**Photographs of vegetative shoot with/without cytokinin treatment.**

12-day-old plants grown on normal or cytokinin-containing media were photographed. Arrowheads indicate excessive formation of malformed leaves. The dot indicates a significantly enlarged SAM. Bars = 250  $\mu$ m

# Supplemental Figure S3

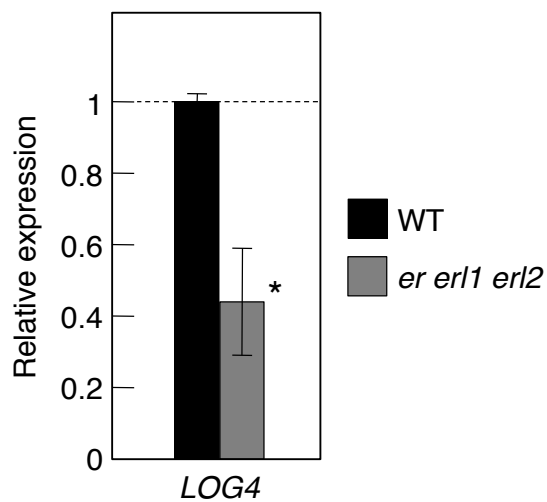

## Supplemental Figure S3 Expression levels of *LOG4*.

Aerial parts of 10-day-old seedlings were analyzed by quantitative RT-PCR. The expression levels were normalized with respect to that of  $\beta$ -*TUBULIN*. Data shown are means of three independent samples (10 individuals were collected as a pool for each sample) with error bars representing s.d. Asterisks indicate significant differences by Student's *t* test ( $P < 0.05$ ).
